# Supplementary material for: Phosphorylation and O-GlcNAcylation at the same α-synuclein site generate distinct fibril structures
Source: PubMed Central journal article supplement (PMC10973503; doi:10.1038/s41467-024-46898-1), 2024-03-27
Supplement: 41467_2024_46898_MOESM1_ESM.pdf [file 41467_2024_46898_MOESM1_ESM.pdf]

# Supplementary Information for

## Phosphorylation and O-GlcNAcylation at the same $\alpha$ -synuclein site generate distinct fibril structures

Jinjian Hu<sup>1†</sup>, Wencheng Xia<sup>2†</sup>, Shuyi Zeng<sup>3,4†</sup>, Yeh-Jun Lim<sup>1†</sup>, Youqi Tao<sup>3,4</sup>, Yunpeng Sun<sup>2</sup>, Lang Zhao<sup>1</sup>, Haosen Wang<sup>1</sup>, Weidong Le<sup>5,6</sup>, Dan Li<sup>3,4</sup>, Shengnan Zhang<sup>2</sup>, Cong Liu<sup>2,7\*</sup>, Yan-Mei Li<sup>1\*</sup>

<sup>1</sup>Key Laboratory of Bioorganic Phosphorus Chemistry and Chemical Biology (Ministry of Education), Department of Chemistry, Tsinghua University, Beijing, 100084, China.

<sup>2</sup>Interdisciplinary Research Center on Biology and Chemistry, Shanghai Institute of Organic Chemistry, Chinese Academy of Sciences, Shanghai, 201210, China.

<sup>3</sup>Bio-X Institutes, Key Laboratory for the Genetics of Developmental and Neuropsychiatric Disorders (Ministry of Education), Shanghai Jiao Tong University, Shanghai, 200030, China.

<sup>4</sup>Zhangjiang Institute for Advanced Study, Shanghai Jiao Tong University, Shanghai, 200240, China.

<sup>5</sup>Shanghai University of Medicine & Health Sciences Affiliated Zhoupu Hospital, Shanghai, 201318, China.

<sup>6</sup>Center for Clinical and Translational Medicine, Shanghai University of Medicine and Health Sciences, Shanghai, 201318, China.

<sup>7</sup>State Key Laboratory of Chemical Biology, Shanghai Institute of Organic Chemistry, Chinese Academy of Sciences, Shanghai, 200032, China.

† J.H., W.X., S.Z., and Y.-J.L. contribute equally to this work.

\*To whom correspondence should be addressed. Email: [liyjm@mail.tsinghua.edu.cn](mailto:liyjm@mail.tsinghua.edu.cn) or [liulab@sioc.ac.cn](mailto:liulab@sioc.ac.cn)

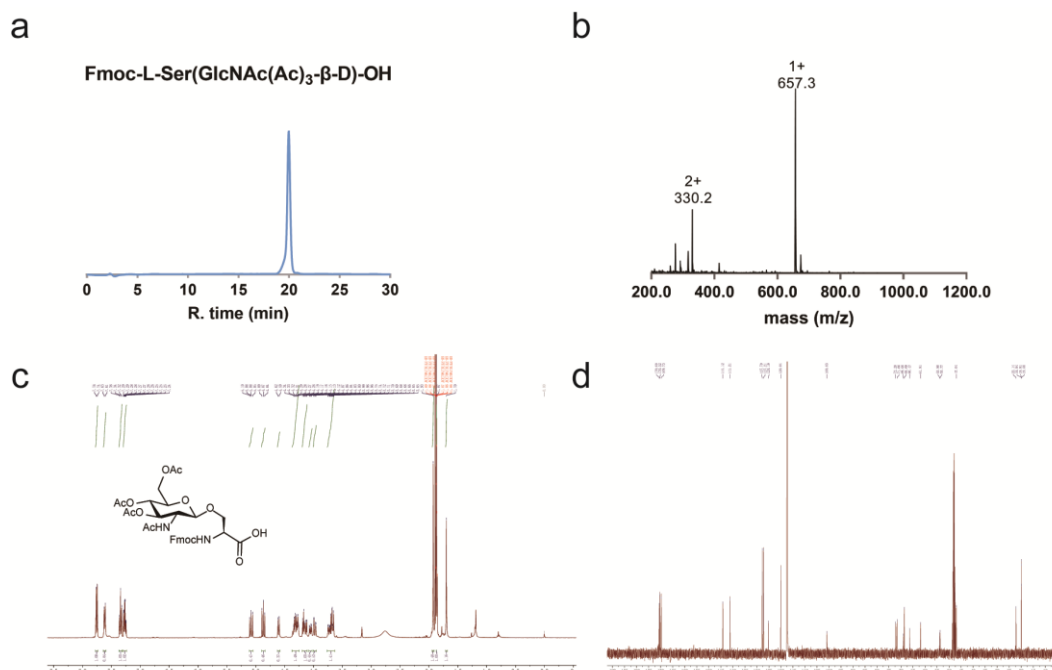

**Supplementary Fig. 1. Characterization of Fmoc-L-Ser(GlcNAc(Ac)<sub>3</sub>-β-D)-OH.**

**a** Analytical HPLC result of Fmoc-L-Ser(GlcNAc(Ac)<sub>3</sub>-β-D)-OH. Retention time is about 19.95 min in a linear gradient of 50-90%B for 30 min (HPLC solvent A: water, 0.06% TFA; B: 80% CH<sub>3</sub>CN/water, 0.06% TFA). **b** ESI-MS characterization of Fmoc-L-Ser(GlcNAc(Ac)<sub>3</sub>-β-D)-OH. Calculated mass: 656.6 Da, observed mass: 656.3 Da. **c** <sup>1</sup>H NMR characterization of Fmoc-L-Ser(GlcNAc(Ac)<sub>3</sub>-β-D)-OH (400 MHz, Acetonitrile-*d*<sub>3</sub>) δ 7.75 (d, J = 7.6 Hz, 2H), 7.62 (d, J = 7.5 Hz, 2H), 7.34 (t, J = 7.5 Hz, 2H), 7.27 (tdd, J = 7.4, 3.6, 1.2 Hz, 2H), 5.08 (dd, J = 10.6, 9.4 Hz, 1H), 4.95 – 4.80 (m, 1H), 4.60 (d, J = 8.5 Hz, 1H), 4.37 – 4.25 (m, 3H), 4.20 – 4.11 (m, 2H), 4.05 (dd, J = 10.5, 4.6 Hz, 1H), 3.98 (dd, J = 12.3, 2.5 Hz, 1H), 3.76 – 3.63 (m, 3H), 1.93 (s, 3H), 1.87 (s, 2H), 1.70 (s, 2H). **d** <sup>13</sup>C NMR characterization of Fmoc-L-Ser(GlcNAc(Ac)<sub>3</sub>-β-D)-OH (400 MHz, Acetonitrile-*d*<sub>3</sub>) δ 170.60, 170.32, 169.73, 144.12, 141.21, 127.79, 127.21, 125.19, 120.04, 100.83, 72.20, 71.66, 69.08, 68.69, 66.47, 61.91, 53.90, 53.77, 47.04, 22.14, 19.94, 19.91, 19.88. Source data are provided as a Source Data file.

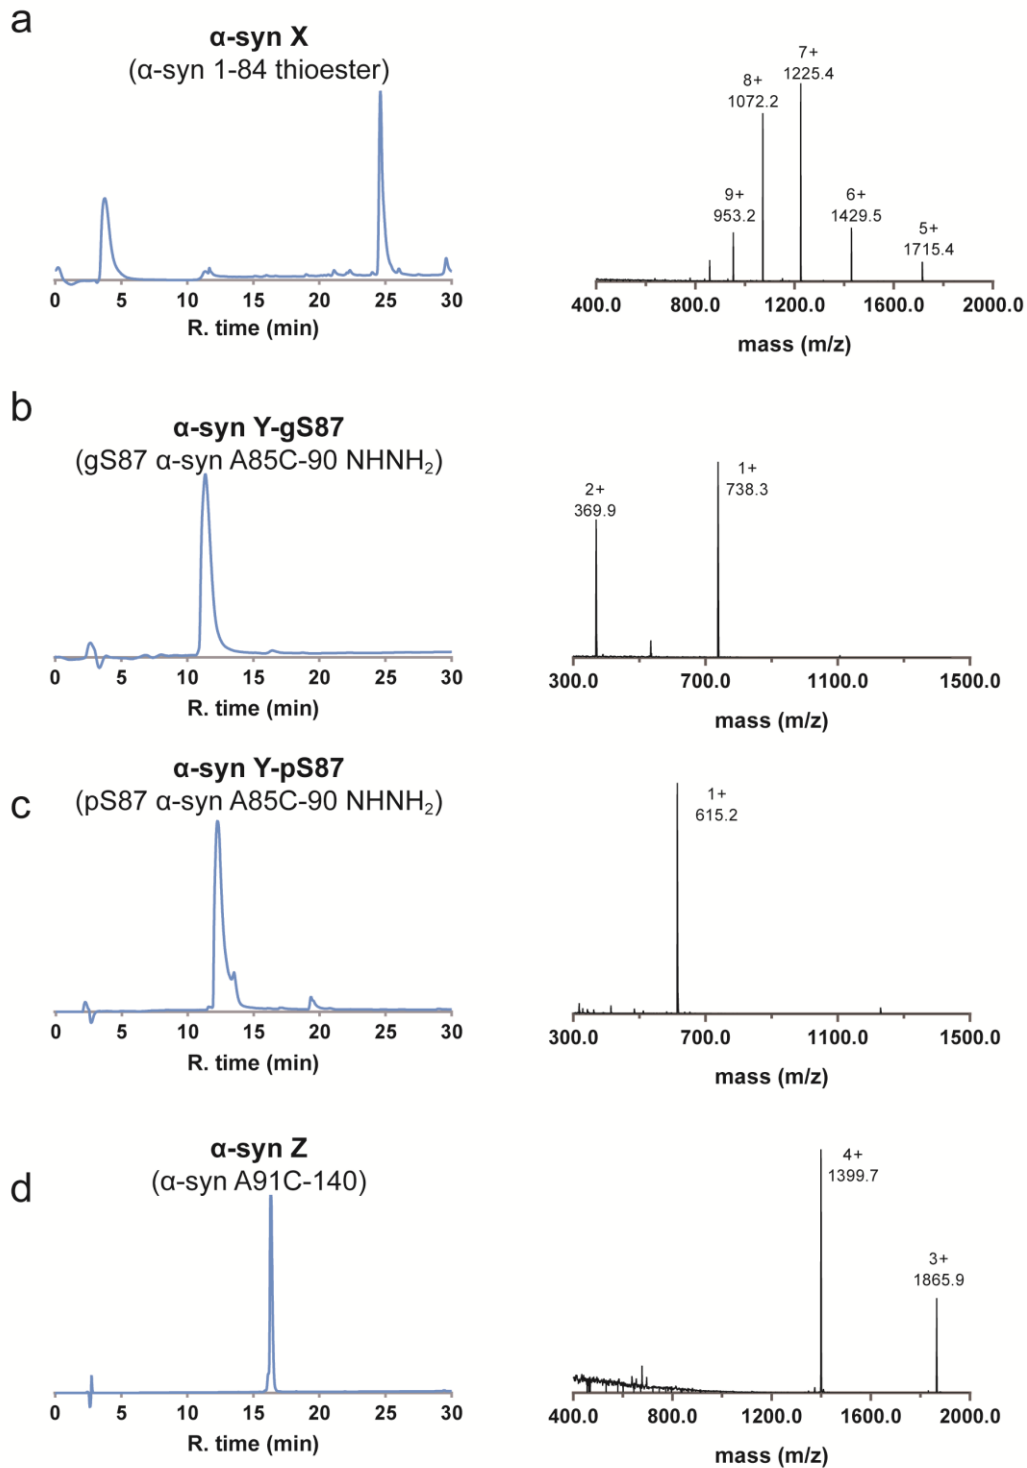

**Supplementary Fig. 2. Characterization of the synthetic segments: X, Y, and Z.**

**a** Characterization of  $\alpha$ -syn X (MesNa thioester). Left: analytical HPLC result of  $\alpha$ -syn X in Buffer. Retention time is about 24.62 min in a linear gradient of 30-70%B for 30 min; Right: ESI-MS characterization of  $\alpha$ -syn X (MesNa thioester). Calculated mass: 8569.7 Da, observed mass: 8570.2 Da. **b** Characterization of  $\alpha$ -syn Y-gS87. Left: analytical HPLC result of  $\alpha$ -syn Y-gS87. Retention time is about 11.36 min in a linear gradient of 5-25%B for 30 min; Right: ESI-MS characterization of  $\alpha$ -syn Y-gS87. Calculated mass: 737.3 Da observed mass: 737.5 Da. **c** Characterization of  $\alpha$ -syn Y-

pS87. Left: analytical HPLC result of  $\alpha$ -syn Y-gS87. Retention time is about 12.25 min in a linear gradient of 5-25%B for 30 min; Right: ESI-MS characterization of  $\alpha$ -syn Y-pS87. Calculated mass: 614.2 Da, observed mass: 614.2 Da. **d** Characterization of  $\alpha$ -syn Z. Left: analytical HPLC result of  $\alpha$ -syn Z. Retention time is about 16.31 min in a linear gradient of 30-70%B for 30 min; Right: ESI-MS characterization of  $\alpha$ -syn Z. Calculated mass: 5594.0 Da, observed mass: 5594.7 Da. Source data are provided as a Source Data file.

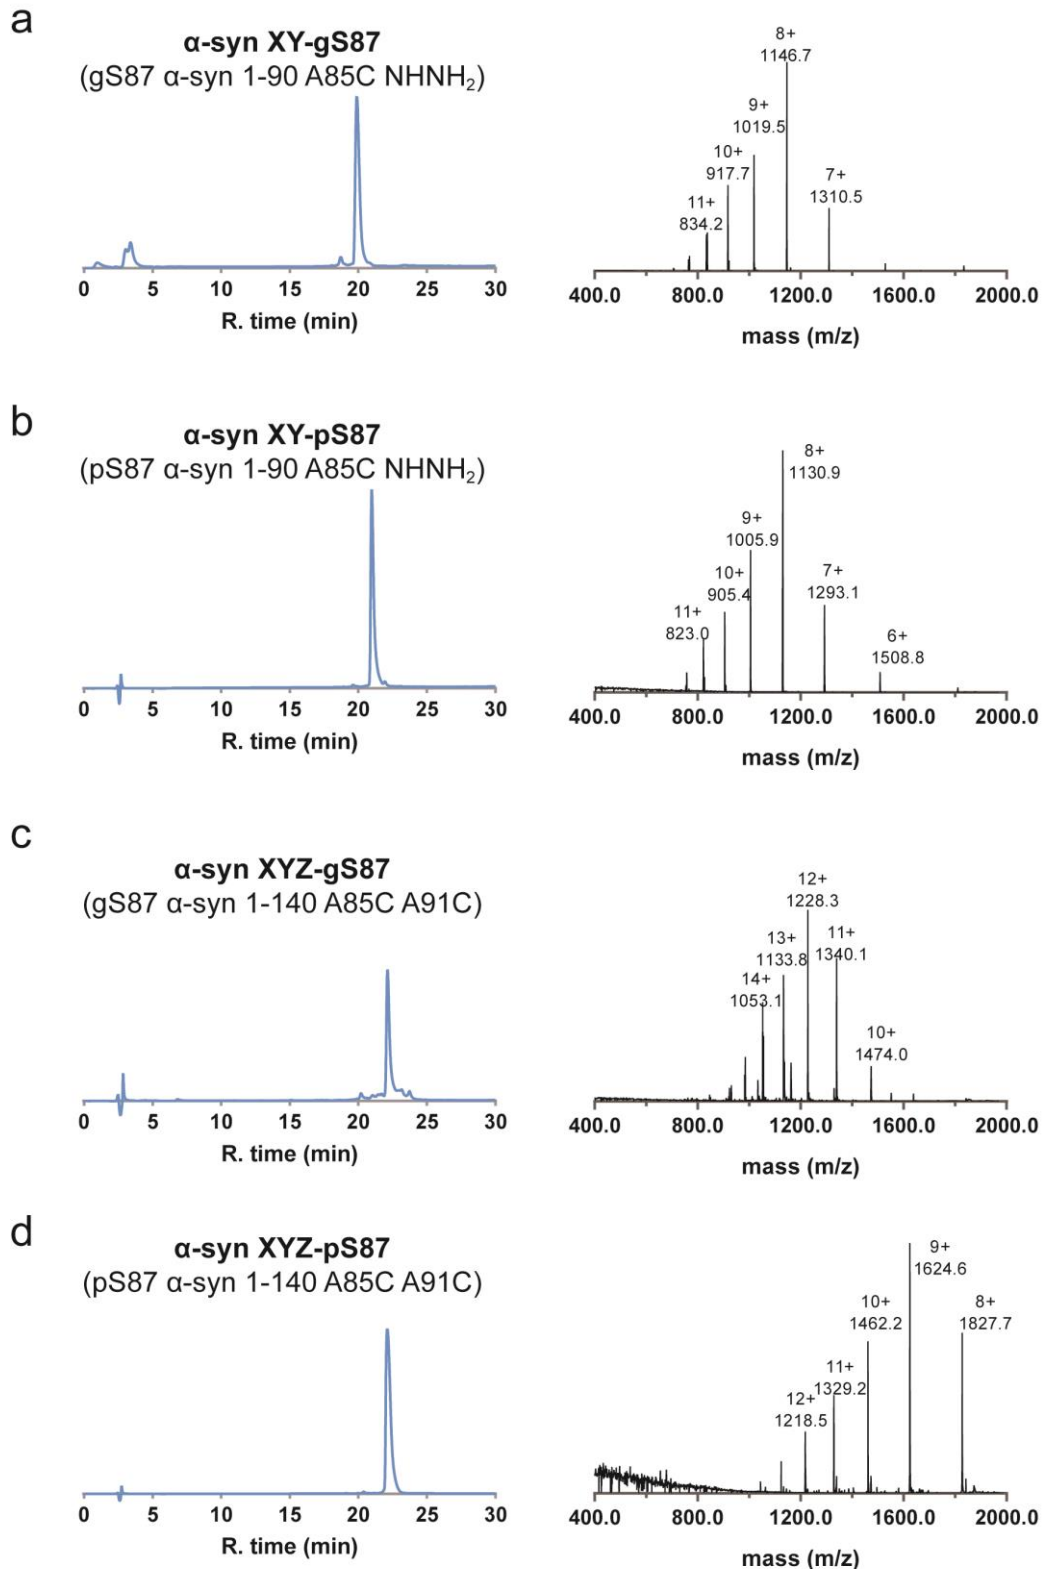

**Supplementary Fig. 3. Characterization of the synthetic segments: XY and XYZ.**  
**a** Characterization of  $\alpha$ -syn XY-gS87. Left: analytical HPLC result of  $\alpha$ -syn XY-gS87. Retention time is about 19.88 min in a linear gradient of 30-70%B for 30 min; Right: ESI-MS characterization of  $\alpha$ -syn XY-gS87. Calculated mass: 9165.4 Da observed mass: 9165.8 Da. **b** Characterization of  $\alpha$ -syn XY-pS87. Left: analytical HPLC result

of  $\alpha$ -syn XY-pS87. Retention time is about 20.98 min in a linear gradient of 30-70%B for 30 min; Right: ESI-MS characterization of  $\alpha$ -syn XY-pS87. Calculated mass: 9042.3 Da, observed mass: 9043.7 Da. **c** Characterization of  $\alpha$ -syn XYZ-gS87. Left: analytical HPLC result of  $\alpha$ -syn XYZ-gS87. Retention time is about 22.13 min in a linear gradient of 30-70%B for 30 min; Right: ESI-MS characterization of  $\alpha$ -syn XYZ-gS87. Calculated mass: 14727.3 Da, observed mass: 14729.2 Da. **d** Characterization of  $\alpha$ -syn XYZ-pS87. Left: analytical HPLC result of  $\alpha$ -syn XYZ-pS87. Retention time is about 22.11 min in a linear gradient of 30-70%B for 30 min; Right: ESI-MS characterization of  $\alpha$ -syn XYZ-pS87. Calculated mass: 14604.3 Da, observed mass: 14612.1 Da. Source data are provided as a Source Data file.

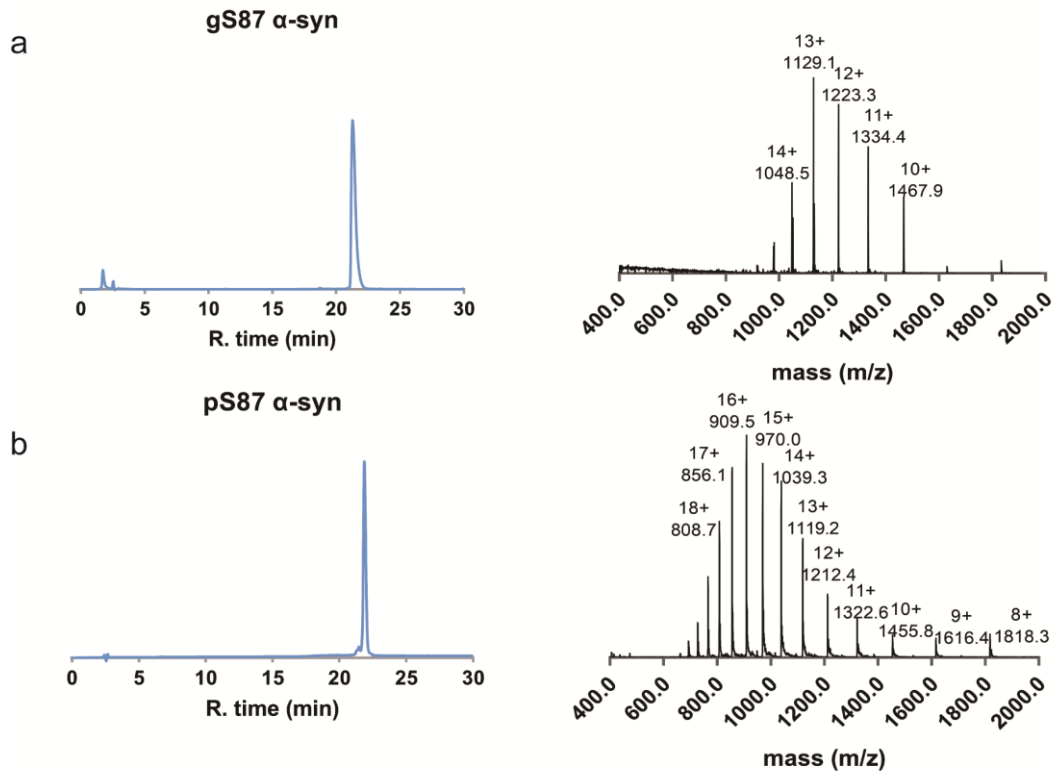

**Supplementary Fig. 4. Characterization of the synthetic pS87  $\alpha$ -syn and gS87  $\alpha$ -syn.**

**a** Characterization of gS87  $\alpha$ -syn. Left: analytical HPLC result of gS87  $\alpha$ -syn. Retention time is about 21.28 min in a linear gradient of 30-70%B for 30 min; Right: ESI-MS characterization of gS87  $\alpha$ -syn. Calculated mass: 14663.3 Da, observed mass: 14666.1 Da. **b** Characterization of pS87  $\alpha$ -syn. Left: analytical HPLC result of pS87  $\alpha$ -syn. Retention time is about 21.46 min in a linear gradient of 30-70%B for 30 min; Right: ESI-MS characterization of pS87  $\alpha$ -syn. Calculated mass: 14540.1 Da observed mass: 14536.4 Da. Source data are provided as a Source Data file.

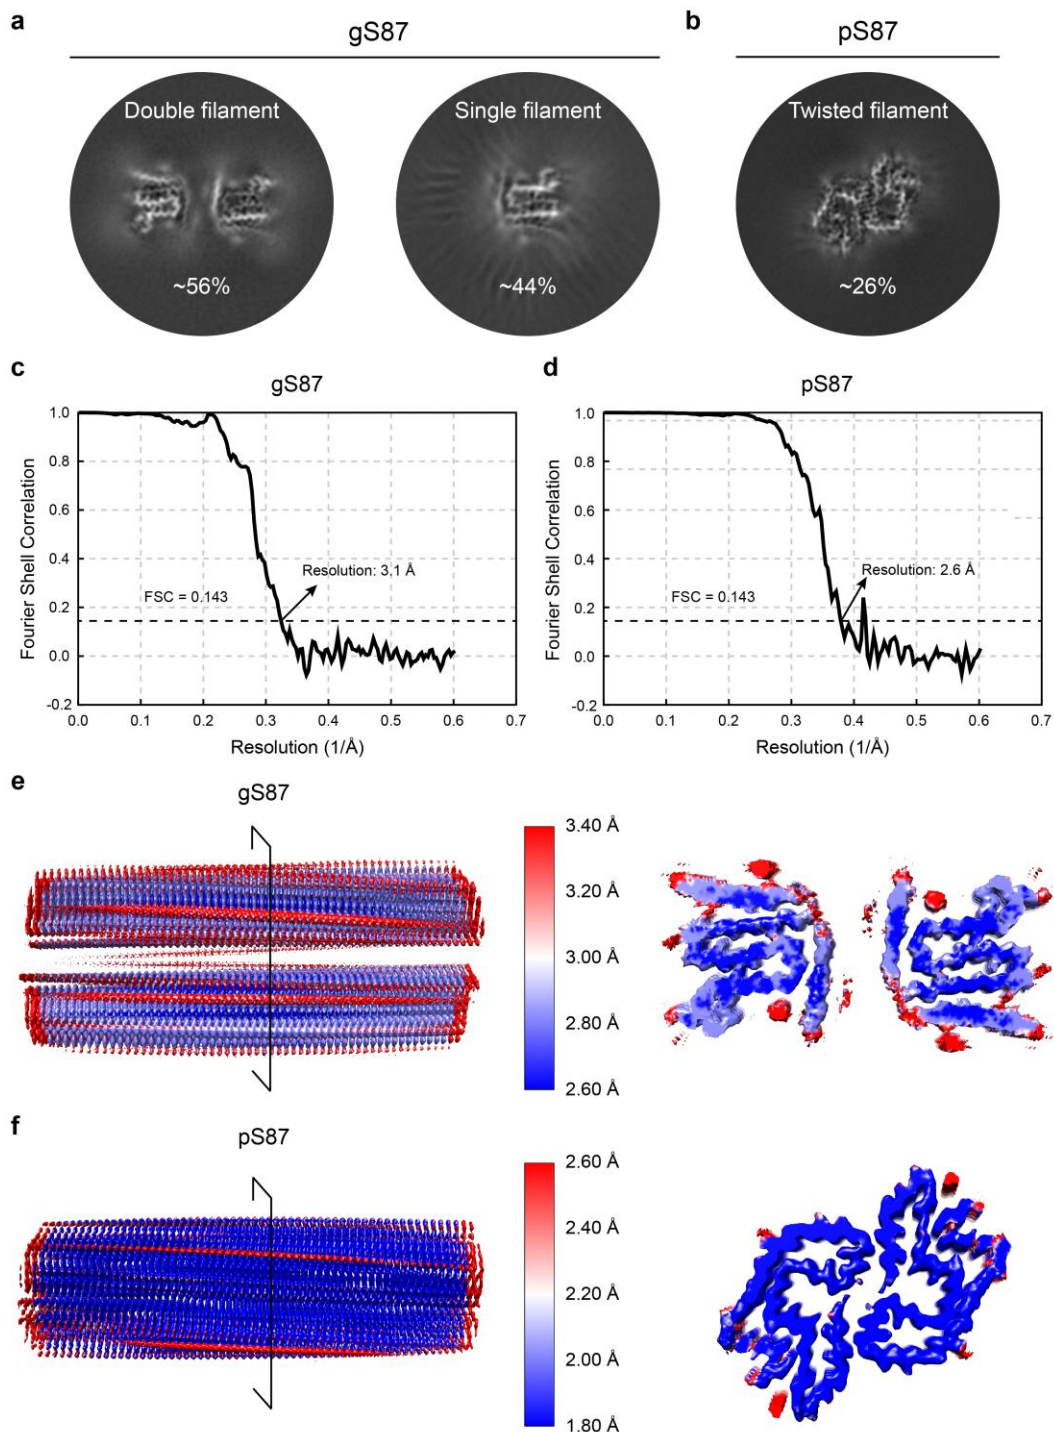

**Supplementary Fig. 5. Cryo-EM structure determination of the gS87 and pS87  $\alpha$ -syn fibrils.**

**a** 3D classification results of the double filament polymorph (~56%) and the single filament polymorph (~44%) of the gS87  $\alpha$ -syn fibril. **b** 3D classification result of the twisted filament polymorph (~26%) of the pS87  $\alpha$ -syn fibril. **c, d** Gold-standard Fourier shell correlation (FSC) curves of the density maps of the gS87 (**c**) and pS87 (**d**)  $\alpha$ -syn fibrils. **e, f** Local resolution estimations of the density maps of gS87 (**e**) and pS87 (**f**).



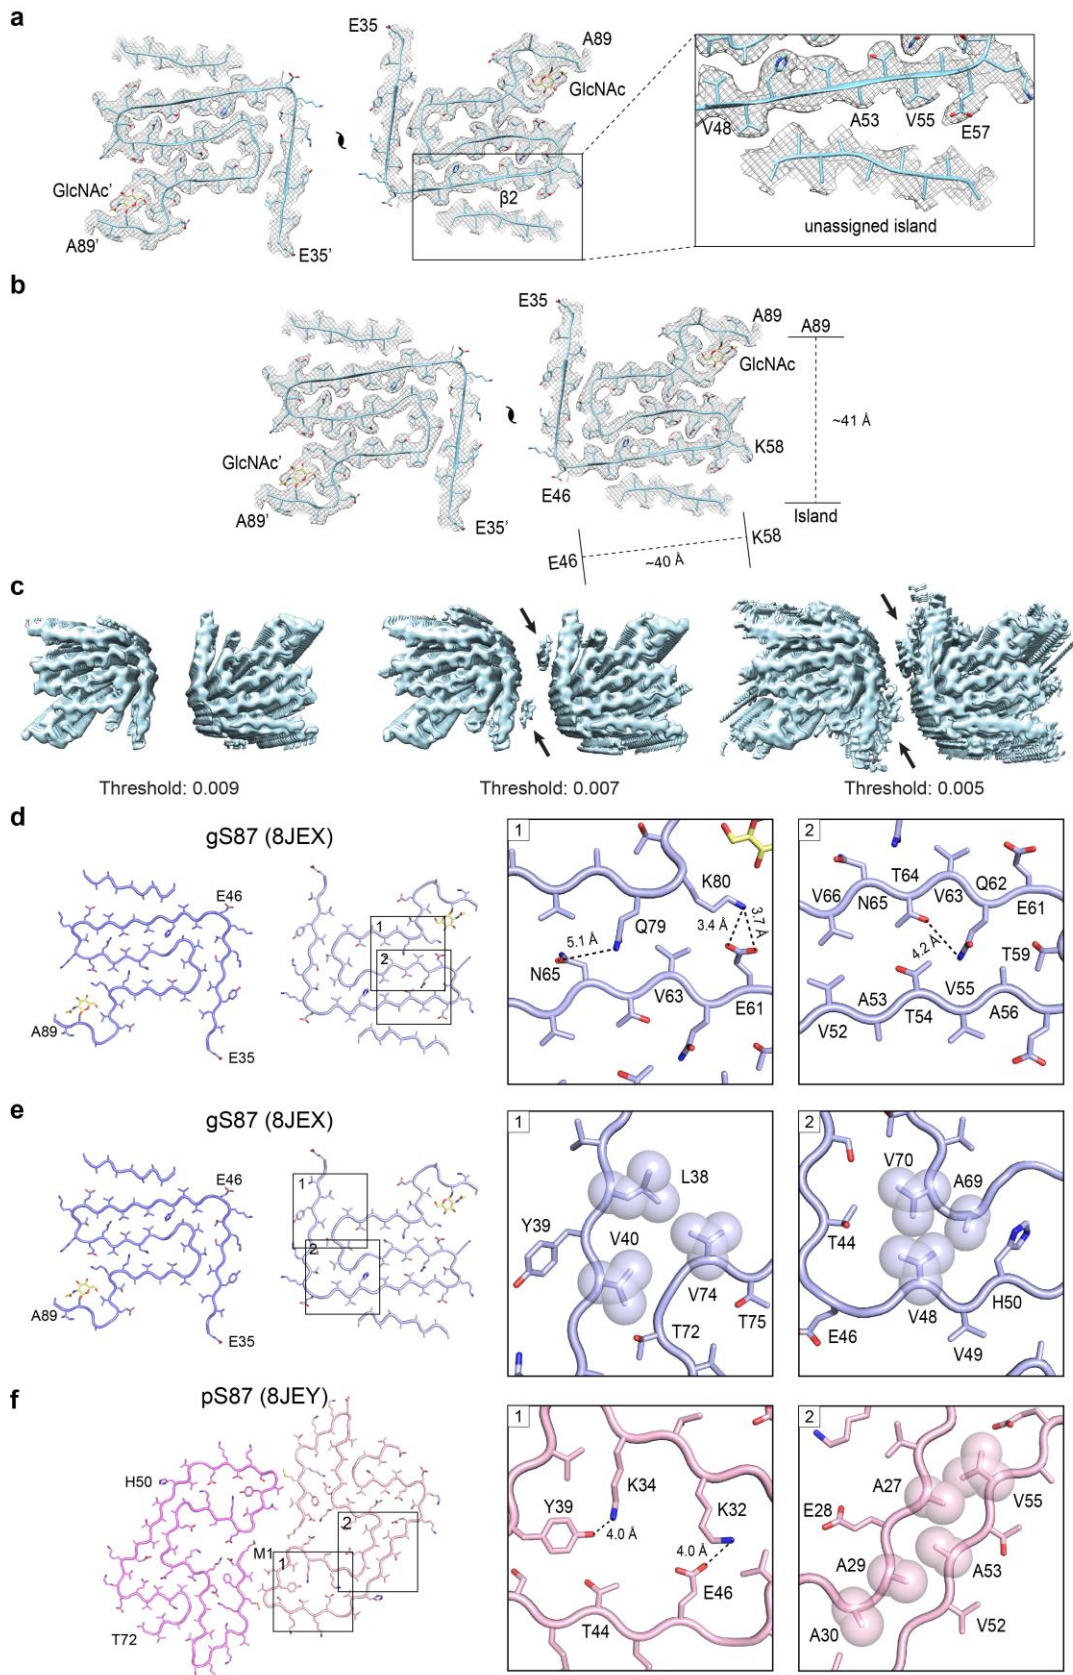

**Supplementary Fig. 6. Structural analysis of the gS87 and pS87  $\alpha$ -syn fibrils.**

**a** In the electron density map of the gS87 fibril, the unassigned island was observed on the outer surface of the fibril core, which was adjacent to  $\beta 2$ . **b** Cross-section view for

the density map with a built-in structure model of gS87  $\alpha$ -syn, and the measured distances between A89 & island and E46 & K58 ( $\sim 40$  Å for 12 residues). **c** gS87 density maps of different threshold values with extra densities marked. **d** Zoom-in views of hydrophilic zipper-like interactions in gS87 fibril structure to the stabilization of the U-shaped structure. **e** Zoom-in views of the hydrophobic interactions in gS87 fibril model. Residues involved in the interactions are indicated in spheres. **f** The structure of the pS87 fibril, with the salt bridge between K32 and E46, the hydrogen bond between K34 and Y39, and the steric zipper-like hydrophobic interaction shown in the zoom-in views.

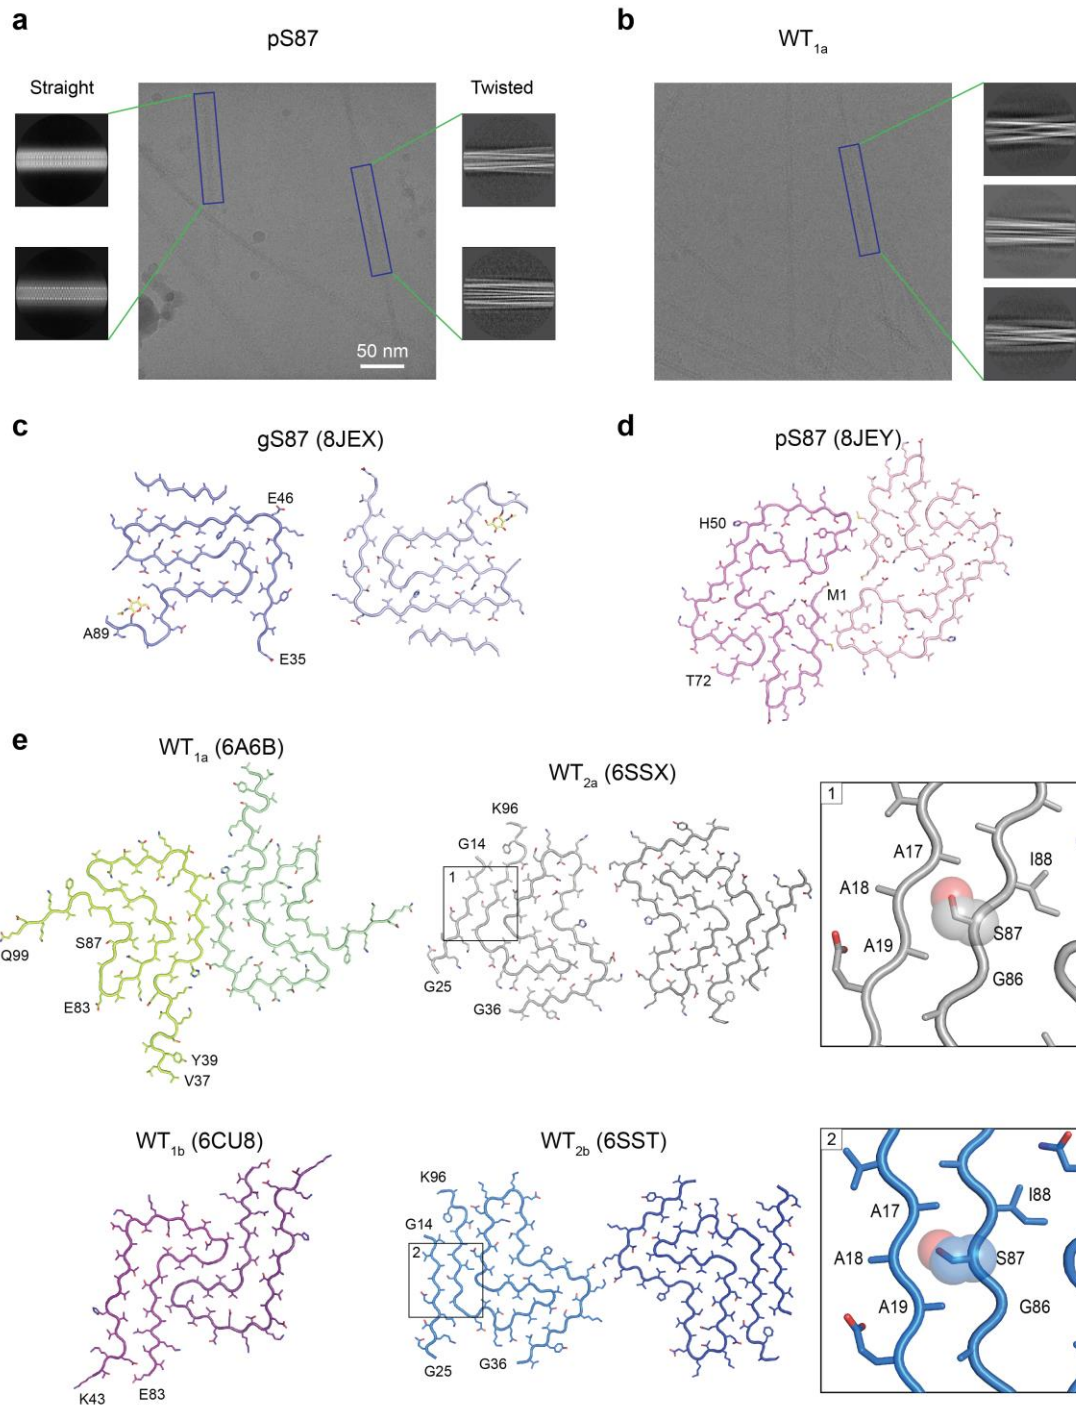

**Supplementary Fig. 7. Structural comparison of the gS87, pS87 and different WT fibril polymorphs.**

**a** 2D classification averages of straight polymorph (left) and twisted polymorph (right) of pS87 fibril. **b** 2D classification averages of WT polymorph 1a (WT<sub>1a</sub>). **c**, **d** The structural model of gS87 fibril (**c**) and pS87 fibril (**d**). **e** The structure of unmodified WT  $\alpha$ -syn fibrils (Polymorph 1a, 1b, 2a and 2b) with their PDB codes (top), and the conformation of S87 shown in the zoom-in views (bottom).

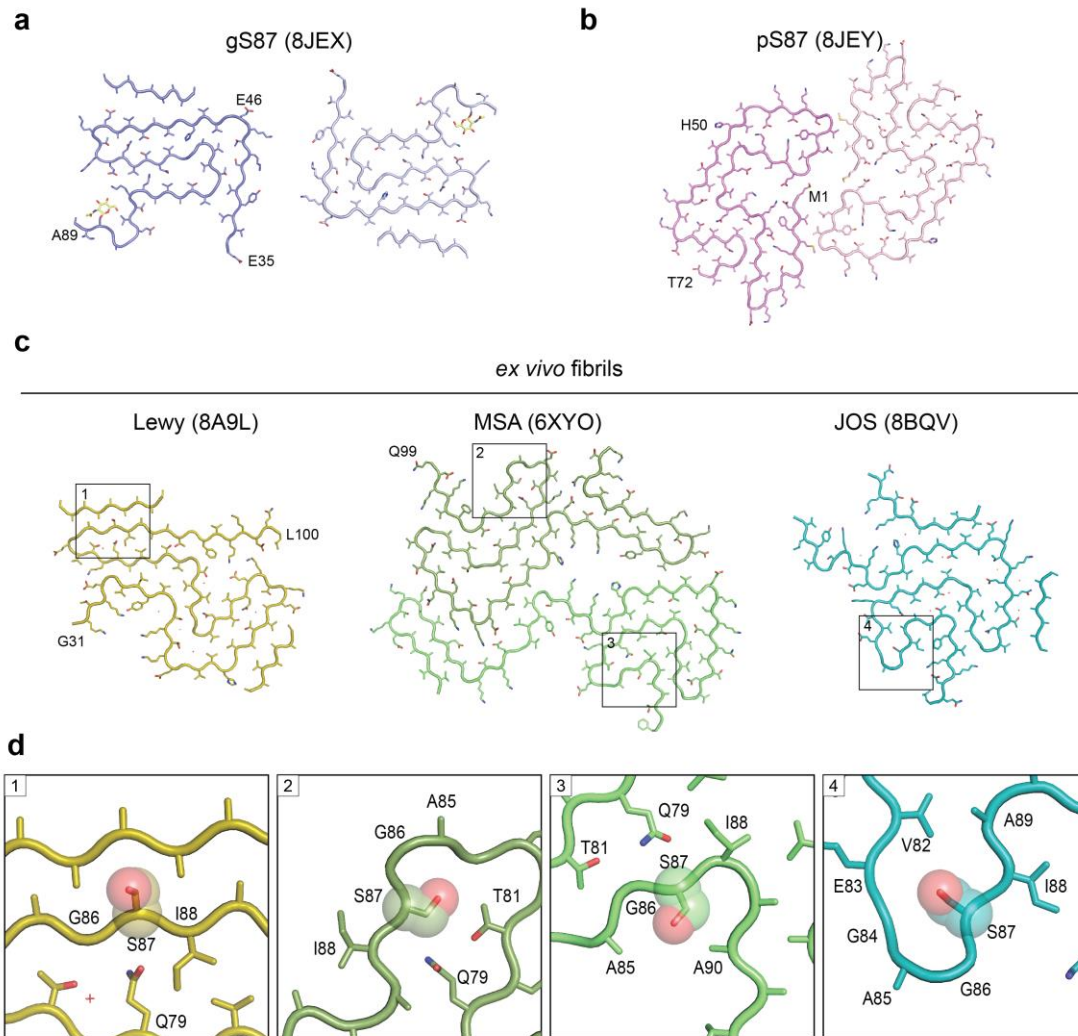

**Supplementary Fig. 8. Structural analysis of the gS87, pS87 and *ex vivo*  $\alpha$ -syn fibrils.**

**a, b** The structural model of gS87 fibril (**a**) and pS87 fibril (**b**). **c** The structural model of *ex vivo* fibrils: Lewy fold (PDB: 8A9L), MSA fold (PDB: 6XYO) and JOS fold (PDB: 8BQV). **d** Zoom-in views of conformation of S87 in (**c**).



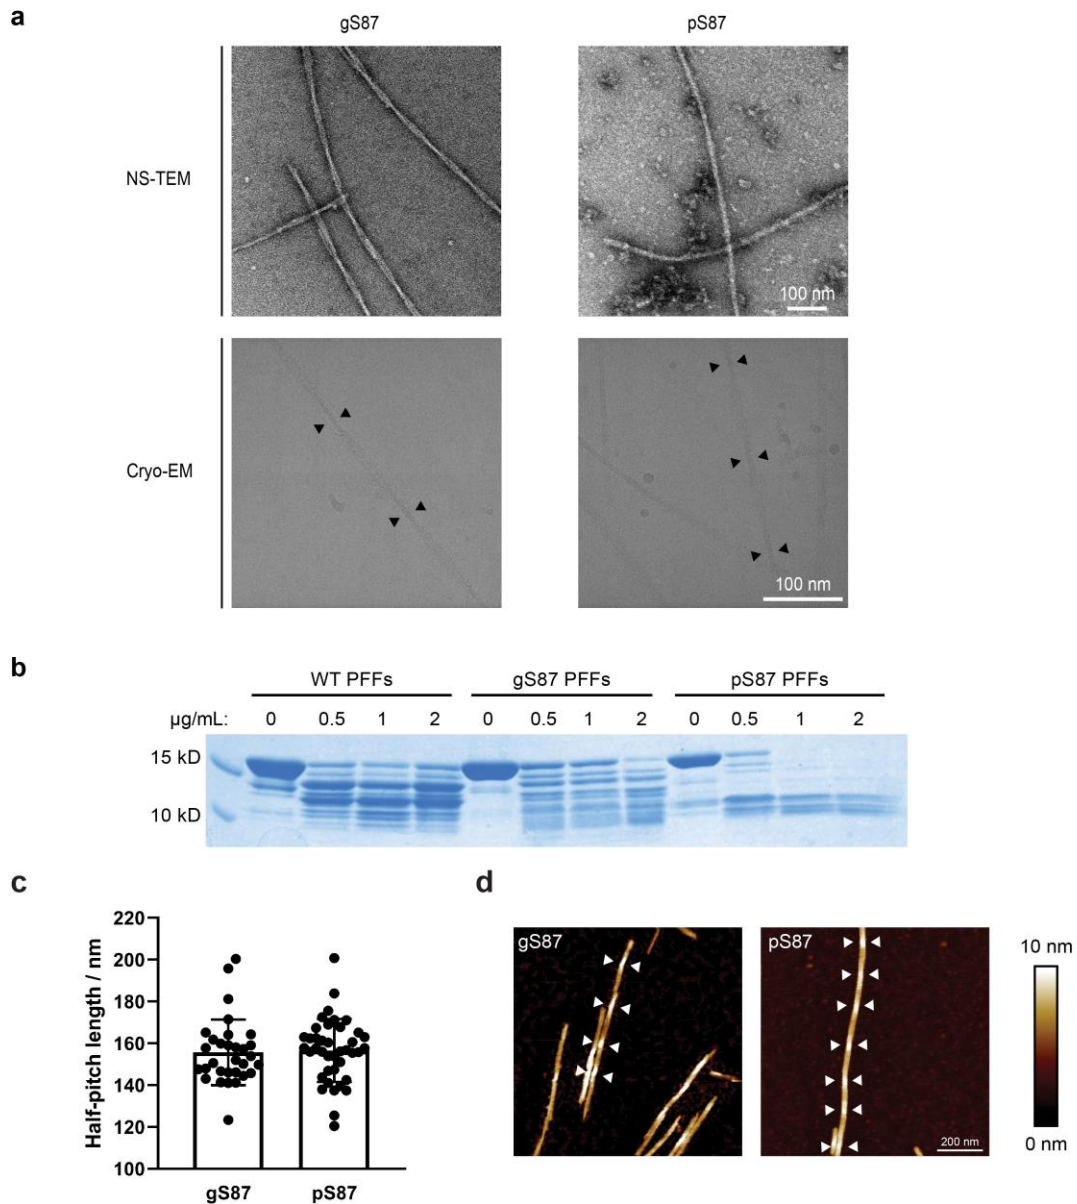

**Supplementary Fig. 9. Characterization of unmodified WT, gS87 and pS87 fibrils.** **a** The fibrils of gS87 (left panel) and pS87 (right panel) fibrils characterized by NS-TEM (top) and cryo-EM (bottom) with twisted fibrils marked. Scale bar: 100 nm. **b** unmodified WT, gS87 and pS87 PFFs were incubated with proteinase K with different concentrations as indicated at 37°C for 20 min. **c** The AFM statistics of gS87 and pS87 half-pitch length with the mean of 156 nm, 157 nm, respectively. Data correspond to mean  $\pm$  s.d.,  $n = 31$  (gS87),  $n = 40$  (pS87). **d** AFM characterization gS87 and pS87 fibrils with half-pitch marked. Scale bar: 200 nm. Source data are provided as a Source Data file.

**Supplementary Table 1. Cryo-EM data collection, modeling and refinement statistics.**

|                                            | <b>gS87 <math>\alpha</math>-syn</b> | <b>pS87 <math>\alpha</math>-syn</b> |
|--------------------------------------------|-------------------------------------|-------------------------------------|
| <b>Data collection and processing</b>      | (EMD: 36202)<br>(PDB: 8JEX)         | (EMD: 36203)<br>(PDB: 8JEY)         |
| <b>Data Collection</b>                     |                                     |                                     |
| Magnification ( $\times$ )                 | 105,000                             | 105,000                             |
| Pixel size ( $\text{\AA}$ )                | 0.83                                | 0.83                                |
| Defocus Range ( $\mu\text{m}$ )            | -1.0 to -2.0                        | -1.0 to -2.0                        |
| Voltage (kV)                               | 300                                 | 300                                 |
| Camera                                     | BioContinuum K3                     | BioContinuum K3                     |
| Microscope                                 | Krios G4                            | Krios G4                            |
| Exposure time (s/frame)                    | 0.05                                | 0.05                                |
| Number of frames                           | 40                                  | 40                                  |
| Total dose ( $\text{e}^-/\text{\AA}^2$ )   | 55                                  | 55                                  |
| <b>Reconstruction</b>                      |                                     |                                     |
| Micrographs                                | 2,134                               | 2,423                               |
| Manually picked fibrils                    | 21,328                              | 27,806                              |
| Box size (pixel)                           | 360                                 | 360                                 |
| Inter-box distance ( $\text{\AA}$ )        | 30                                  | 30                                  |
| Initial particle images (no.)              | 465,930                             | 647,678                             |
| Final particle images (no.)                | 24,910                              | 61,047                              |
| Resolution ( $\text{\AA}$ )                | 3.1                                 | 2.6                                 |
| Map sharpening B-factor ( $\text{\AA}^2$ ) | -96.50                              | -86.47                              |
| Helical rise ( $\text{\AA}$ )              | -179.72                             | -179.72                             |
| Helical twist ( $^\circ$ )                 | 2.41                                | 2.41                                |
| <b>Atomic model</b>                        |                                     |                                     |
| Non-hydrogen atoms                         | 2,616                               | 3,060                               |
| Protein residues                           | 384                                 | 432                                 |
| Ligands                                    | 6                                   | 0                                   |
| r.m.s.d. Bond lengths                      | 0.008                               | 0.004                               |
| r.m.s.d. Bond angles                       | 0.986                               | 0.746                               |
| All-atom clash score                       | 4.96                                | 4.75                                |
| Rotamer outliers                           | 0 %                                 | 0 %                                 |
| Ramachandran Outliers                      | 0 %                                 | 0 %                                 |
| Ramachandran Allowed                       | 3.33 %                              | 4.29 %                              |
| Ramachandran Favored                       | 96.67 %                             | 95.71 %                             |
